# Adult mortality before and during the COVID-19 pandemic in nine communities of Yemen: a key informant study

Mervat Alhaffar<sup>1\*</sup>, Huda BaSaleem<sup>2</sup>, Fouad Othman<sup>3</sup>, Khaled Alsakkaf<sup>2</sup>, Sena Mohammed Mohsen Alkhateeb<sup>4</sup>, Hussein Kolaise<sup>5</sup>, Abdullah K. Babattah<sup>6</sup>, Yaseen Abdulmalik Mahyoub Salem<sup>4</sup>, Hannah Brindle<sup>1</sup>, Najwa Yahya<sup>7</sup>, Pasquale Pepe<sup>1</sup>, Francesco Checchi<sup>1</sup>

<sup>1</sup> Department of Infectious Disease Epidemiology

Faculty of Epidemiology and Population Health

London School of Hygiene and Tropical Medicine, London, UK

<sup>2</sup> Department of Community Medicine and Public Health

Faculty of Medicine and Health Science

University of Aden, Aden, Yemen

<sup>3</sup> Faculty of Medicine and Health Science

Ta'iz University, Ta'iz, Yemen

<sup>4</sup> Epidemiology Surveillance Office,

Ta'iz Governorate Health Office, Ta'iz, Yemen

<sup>5</sup> Department of Internal Medicine

Faculty of Medicine and Health Science

University of Aden, Aden, Yemen

**NOTE: This preprint reports new research that has not been certified by peer review and should not be used to guide clinical practice.**

24 6 Primary Health Care Program, Health Sector

25 HUMAN ACCESS for Partnership and Development

26 Aden, Yemen

27 7 Yemen Public Health Network

28 Aden, Yemen

29

30 \* Corresponding author: [Mervat.Alhaffar1@lshtm.ac.uk](mailto:Mervat.Alhaffar1@lshtm.ac.uk)

## 31 Abstract

### 32 Introduction

33 Widespread armed conflict has affected Yemen since 2014. To date, the mortality toll of seven years of  
34 crisis, and any excess due to the COVID-19 pandemic, are not well quantified. We attempted to estimate  
35 population mortality during the pre-pandemic and pandemic periods in nine purposively selected urban  
36 and rural communities of southern and central Yemen (Aden and Ta'iz governorates), totalling > 100,000  
37 people.

38

### 39 Methods

40 Within each study site, we collected lists of decedents between January 2014-March 2021 by interviewing  
41 different categories of key community informants, including community leaders, imams, healthcare  
42 workers, senior citizens and others. After linking records across lists based on key variables, we applied  
43 two-, three- or four-list capture-recapture analysis to estimate total death tolls. We also computed death  
44 rates by combining these estimates with population denominators, themselves subject to estimation.

45

## 46 Results

47 After interviewing 138 disproportionately (74.6%) male informants, we identified 2445 unique decedents.  
48 While informants recalled deaths throughout the study period, reported deaths among children were  
49 sparse: we thus restricted analysis to persons aged  $\geq 15$  years old. We noted a peak in reported deaths  
50 during May-July 2020, plausibly coinciding with the first COVID-19 wave. Death rate estimates featured  
51 uninformatively large confidence intervals, but appeared elevated compared to the non-crisis baseline,  
52 particularly in two sites where a large proportion of deaths were attributed to war injuries. There was no  
53 clear-cut evidence of excess mortality during the pandemic period.

54

## 55 Conclusions

56 We found some evidence of a peak in mortality during the early phase of the pandemic, but death rate  
57 estimates were otherwise too imprecise to enable strong inference on trends. Estimates suggested  
58 substantial mortality elevations from baseline during the crisis period, but are subject to serious potential  
59 biases. The study highlighted challenges of data collection in this insecure, politically contested  
60 environment.

61

## 62 Key words

63 Yemen, humanitarian, armed conflict, crisis, mortality, SARS-CoV-2, COVID-19, key informant, capture  
64 recapture, multiple systems estimation

## 65 Background

66 Yemen has been affected by political unrest throughout recent history [1–3]. The current armed conflict  
67 started in 2014. The country is split into several areas of control with contested borders and multiple local  
68 and international regional actors holding different political and ideological stances [3–6]. The protracted  
69 armed conflict resulted in targeting civilians, healthcare facilities and personnel, water and sanitation  
70 infrastructure, schools, roads and bridges thereby disrupting services and exacerbating poor living  
71 conditions experienced before the war [5, 7–10]. In addition to frequent civilian casualties, the protracted

72 conflict has resulted in widespread forced displacement, food insecurity, severe malnutrition and food  
73 insecurity bordering on potential famine [11], and a heavily disrupted and fragmented health system  
74 consisting of two ministries of health (controlled by two different authorities in the north and the south), one  
75 based in Sana'a and the other in Aden [8, 12].

76 The first laboratory-confirmed case of COVID-19 in Yemen was announced in April 2020 [13]. Efforts to  
77 track the pandemic's dynamics and share information relating to its impact on morbidity and mortality have  
78 differed between areas of political control. Houthi authorities in particular have tended not to openly report  
79 cases and deaths in their areas of control [14–16].

80 In conflict settings, information on health status can help humanitarian actors better allocate scarce  
81 resources and record the progress of response activities [17, 18]. Population mortality is a key indicator of  
82 health status as it captures the contributions of various health risk factors [18, 19]. Additionally,  
83 documenting mortality during conflicts may support advocacy for peacebuilding and post-conflict  
84 reconciliation [20].

85 To contribute evidence on COVID-19 attributable mortality in Yemen, we aimed to estimate the excess  
86 death toll and death rate during the pandemic period, as well as the pre-pandemic levels, in nine selected  
87 sites in the south and central of the country by collecting lists of decedents from key community informants,  
88 and applying capture-recapture statistical analysis to these. A secondary aim was to explore the feasibility  
89 and limitations of conducting such research in this context.

90

## 91 **Methods**

### 92 **Scoping phase**

93 Prior to data collection, we conducted a scoping phase consisting of informal in-depth interviews and group  
94 discussions in Arabic with more than seventy people who identified as Yemenis in the United Kingdom  
95 (UK), Yemen, and other countries. The participants were identified through a snowball approach of  
96 sequential referrals while ensuring a difference in their backgrounds including profession and place of  
97 origin in Yemen. The interviews took place in person in London and Sheffield (after obtaining verbal

98 consent), and online with note-taking used to record the information collected. Interviews included  
99 questions on (i) the categories of people most likely to know about deaths and births in the community, (ii)  
100 the ways in which people report/know about deaths in the community, (iii) whether health facilities or burial  
101 sites keep any written lists on deceased people and (iv) security concerns that might impact participation  
102 or bias people's answers in different areas in Yemen. This scoping phase helped us to form an independent  
103 advisory group of country-based Yemeni researchers and public health actors to provide guidance on the  
104 project, and establish collaborations between the London School of Hygiene and Tropical Medicine, the  
105 University of Aden and Ta'iz University.

106

### 107 **Study population and period**

108 While we originally wished to select a nationally representative sample, study permission was not received  
109 from authorities in Sana'a (the Supreme Council for the Management and Coordination of Humanitarian  
110 Affairs and International Cooperation SCMCHA)[21], and even in southern Yemen, the geographical scope  
111 of data collection was constrained by travel and security challenges. We thus opted to purposively select  
112 nine accessible sites including four in Aden governorate and five in Ta'iz governorate which were identified  
113 by Yemen-based authors and represented different levels and typologies of exposures to the crisis (Table  
114 1). We further selected sites that were clearly delineated (e.g. city neighbourhoods, groups of villages)  
115 and of an approximate population size (5000-20,000) consistent with feasible data collection within the  
116 study's resources and security constraints. All the sites were under the control of the Internationally  
117 Recognised Government (IRG), site names are omitted here to maintain confidentiality of the key  
118 informants. Data collection started on 18<sup>th</sup> January and ended on 31<sup>st</sup> March 2021. We inquired about  
119 deaths among people residing within the site from January 2014 to the start of data collection.

120 Several key informant categories were identified: community leaders and their spouses; healthcare  
121 providers; imams; ritual burial preparers; senior citizens; and teachers. None were known to keep written  
122 death records, except for health facility managers. Moreover, in places where the conflict was intense,  
123 records from local hospitals were destroyed or were missing data from specific years or were not even  
124 collected. Depending on the site's characteristics e.g. urban versus rural or size, some or all of the above  
125 informant categories were identifiable and thus included in the study.

126  
127

Table 1. Characteristics of the study sites and informant lists retained for capture-recapture analysis. A and T refer to sites in Aden and Ta'iz governorates, respectively.

| Site | Rural/<br>Urban | Characteristics<br>(estimated population, March 2021)                                                                                                                                                                                                          | Informant lists<br>(main analysis)                                                                        | Informant lists<br>(alternative analysis)                                                             |
|------|-----------------|----------------------------------------------------------------------------------------------------------------------------------------------------------------------------------------------------------------------------------------------------------------|-----------------------------------------------------------------------------------------------------------|-------------------------------------------------------------------------------------------------------|
| A1   | Urban           | Directly and heavily affected by the armed conflict; under Houthi control for around four months. Residents fled the area due to the lack of water, electricity and fuel, and shortage of food and health services.<br>(population size uncertain)             | 1. Community leaders<br>2. Health workers<br>3. Imams<br>4. Burial preparers                              | 1. Community leaders<br>2. Health workers<br>3. Imams + Burial preparers                              |
| A2   | Urban           | Directly and heavily affected by the armed conflict; under Houthi control for around four months. Residents fled the area due to the lack of water, electricity and fuel, and shortage of food and health services.<br>(population 11,000, ≈9% of subdistrict) | 1. Community leaders<br>2. Senior citizens<br>3. Imams<br>4. Burial preparers                             | 1. Community leaders + senior citizens<br>2. Imams + Burial preparers                                 |
| A3   | Urban           | Moderately affected by the armed conflict; destination of many internally displaced populations (IDPs).<br>(population 2600, ≈2% of subdistrict)                                                                                                               | 1. Community leaders<br>2. Imams<br>3. Burial preparers                                                   | 1. Community leaders<br>2. Imams + Burial preparers                                                   |
| A4   | Urban           | Moderately affected by the armed conflict; destination of many IDPs.<br>(population 9400, ≈6% of subdistrict)                                                                                                                                                  | 1. Community leaders + spouses<br>2. Senior citizens<br>3. Burial preparers                               | 1. Community leaders + spouses + senior citizens<br>2. Burial preparers                               |
| T1   | Urban           | On the contested borders between the two areas of political control.<br>(population 2700, ≈3% of subdistrict)                                                                                                                                                  | 1. Community leaders + spouses + senior citizens + imams<br>2. Health workers                             | 1. Community leaders + spouses + senior citizens<br>2. Health workers<br>3. Imams + Burial preparers  |
| T2   | Rural area      | Ongoing direct conflict since the beginning of the crisis; divided between two areas of control.<br>(population 14,700 100% of subdistrict)                                                                                                                    | 1. Community leaders + senior citizens + imams<br>2. Health workers<br>3. Teachers<br>4. Burial preparers | 1. Community leaders + senior citizens + teachers<br>2. Health workers<br>3. Imams + burial preparers |
| T3   | Semi-urban      | No active conflict, but a destination for many IDPs.<br>(population size uncertain)                                                                                                                                                                            | 1. Community leaders + spouses + senior citizens + imams<br>2. Health workers                             | 1. Community leaders + spouses + senior citizens<br>2. Health workers<br>3. Imams                     |
| T4   | Urban           | Past direct conflict, was under bombardment and siege.<br>(population 8600, ≈15% of subdistrict)                                                                                                                                                               | 1. Community leaders + senior citizens<br>2. Health workers                                               | 1. Community leaders + senior citizens<br>2. Health workers                                           |
| T5   | Rural area      | Ongoing direct conflict since the beginning of the crisis, divided between two areas of control.<br>(population 21,700, 100% of subdistrict)                                                                                                                   | 1. Community leaders<br>2. Senior citizens                                                                | 1. Community leaders + senior citizens<br>(no analysis possible: only one list)                       |

128

## 129 Participant recruitment

130 The in-country research team consisted of three male medical doctors and one female midwife who were  
131 residents and familiar with the study communities. They initially drew on their personal and professional  
132 connections to identify key informants and build trust before conducting the interviews. Participants  
133 provided verbal, researcher-witnessed informed consent. Those who declined to participate were mostly  
134 able to recommend others to be interviewed. All key informants provided consent in-person , mostly after

135 receiving recommendations from respected peers, e.g. another community leader or a hospital manager,  
136 who either wrote letters of introduction or accompanied researchers on their first visits to potential  
137 participants. In Aden, preliminary phone conversations helped to establish rapport with key informants and  
138 facilitate organizing appointments for introducing the study while in Ta'iz in-person visits were necessary.  
139 In Aden 13/69 people contacted (two women and 11 men) declined to participate in the study, while in  
140 Ta'iz 7/89 (all men) declined. Stated reasons for non-participation included concerns that information would  
141 be shared with opposing forces; negative previous experiences with researchers; insufficient time; and  
142 anticipated difficulty to recall deaths.

143

#### 144 Data collection

145 A standardised questionnaire was developed and built using the Open Data Kit (ODK) [22] platform, with  
146 in-built validation rules to collect information on (i) key informants (age, gender, typology, site and  
147 residency) and (ii) names, age, gender, year of death, cause of death, place of death and origin of  
148 decedents within the sites since 2014. Online two-day training sessions for researchers took place in  
149 Arabic consisting of study concepts, procedures for data collection and management, and role-play. Data  
150 were entered into the ODK Application on Android devices and automatically uploaded to a secure server  
151 hosted at the LSHTM. Participants were also offered the option to recall and write down decedent  
152 information in their own time on a printed form, if needed enlisting help from their spouses; researchers  
153 collected the form at a later point and entered the data into ODK.

154 Investigators in Aden, Ta'iz and London monitored data quality, addressed issues and replied to questions  
155 in real-time. After conducting 56 interviews, we paused data collection for a week to share experiences.  
156 Given that the preliminary analysis showed a disproportionate reporting of adult male deaths, we agreed  
157 on procedures to enhance the detection of child and women decedents during subsequent interviews. This  
158 included a heavier reliance on spouses for recall and listing female names as 'mother/wife/daughter of',  
159 which was felt to be more protective of their confidentiality.

160

## 161 Analysis

### 162 *Record linkage*

163 Data were manually cleaned, and duplicates removed from each key informant's list. Linkage criteria  
164 (Table S1, Supplementary File) were developed to establish, for each site, which lists a given decedent  
165 was included in. Individuals' names in Yemen usually consist of first name, father's name, grandfather's  
166 name and lastly tribe name or area/ district of origin. Records with missing first name, gender, age, and/or  
167 year of death were excluded from analysis. The year and age at death were averaged if informants  
168 reported discordant values.

169

### 170 *Capture-recapture analysis*

171 Capture-recapture analysis examines the overlap among lists  $L$  to estimate the number of individuals (in  
172 this case decedents) who have not been captured by any list. This estimate, summed to the number of  
173 individuals appearing on at least one list, provides the total. In this study, lists consisted for each site of  
174 the records collected from specific categories of informants. After record linkage, site data consisted of  
175 two, three or four lists (see below and Table 1).

176 In a two-list scenario, each decedent  $x \in \{1,2,3 \dots N\}$  has status  $x_{10}$  if named within  $L_1$  only,  $x_{01}$  if named  
177 within  $L_2$  only,  $x_{11}$  if named by both lists and  $x_{00}$  if not captured by either list. The resulting contingency  
178 table consists of four cells,  $n_{10}$ ,  $n_{01}$ ,  $n_{11}$  and  $n_{00}$ , the last of which is unknown. We used the simple

179 Chapman estimator to estimate the total number of deaths as  $\hat{N} = n_{10} + n_{01} + n_{11} + \hat{n}_{00} =$

180  $\left(\frac{(n_{10}+1)(n_{01}+1)}{(n_{11}+1)}\right) - 1$ ; we computed a confidence interval (CI) as  $[e^{-z_{\alpha/2}\hat{\sigma}_{0.5}}\varphi, e^{z_{\alpha/2}\hat{\sigma}_{0.5}}\varphi]$ , where  $\varphi = n_{10} +$

181  $n_{01} - n_{11} - 0.5 + \frac{(n_{10}-n_{11}+0.5)(n_{01}-n_{11}+0.5)}{(n_{11}+0.5)}$ ,  $z_{\alpha/2}$  is the normal distribution quantile for a given significance

182 level of interest (1.96 for  $\alpha = 0.05$  or 95%CI) and  $\hat{\sigma}_{0.5} =$

183  $\sqrt{\frac{1}{n_{11}+0.5} + \frac{1}{(n_{10}-n_{11}+0.5)} + \frac{1}{(n_{10}-n_{11}+0.5)} + \frac{n_{11}+0.5}{(n_{10}-n_{11}+0.5)(n_{10}-n_{11}+0.5)}}$ , as per Sadinle [23].

184 In a three-list scenario, the overlap among lists  $L$  may be represented by eight alternative candidate log-  
185 linear Poisson models, each of which features terms for the probability of appearing on any given list, as  
186 well as two-way interaction terms representing potential dependencies among lists: these models range



187 from one with no interaction terms to a model featuring all the two-way interactions  $L_1 \times L_2$ ,  $L_2 \times L_3$  and  
188  $L_1 \times L_3$ . We wished to also include in the models an exposure (period before and during the COVID-19  
189 pandemic in Yemen) and potential confounding variables (age, gender). To allow for continuous  
190 covariates, we used Rossi et al.'s [24] parametrisation of log-linear models, whereby the dataset is  
191 expanded to feature, for each individual, all potential list statuses ( $x_{000}, x_{100}, x_{101}, x_{001}, x_{110}, x_{101}, x_{011}, x_{111}$ );  
192 an outcome of 1 for the actual status, missing for status  $x_{000}$  and 0 otherwise; and any covariate values.  
193 The model, once fit, is used to predict  $\hat{x}_{000}$ , interpretable as each individual's contribution to  $\hat{n}_{000}$ , the  
194 estimate of uncaptured deaths (i.e.  $\hat{n}_{000} = \sum_{i=1}^N \hat{x}_{000}$ ); this quantity may of course be stratified by exposure  
195 stratum. This estimation framework can easily be extended to the four-list scenario, which however entails  
196 a larger set of models, featuring both three-list and/or (hierarchically non-redundant) two-list interactions.  
197 While conventional capture-recapture analysis selects the best-fitting among candidate models, we  
198 adapted Rossi et al.'s suggested approach for averaging multiple models [25]. First, we screened out  
199 models that did not fit (e.g. due to sparse overlap among lists), yielded an implausible  $\hat{n}_{000(0)}$  (defined as  
200  $\geq 10$  times the number of listed deaths) or featured a likelihood-ratio test p-value  $\geq 0.60$  when compared  
201 to the saturated model (indicating potential overfitting). At this stage we also assessed whether to retain  
202 any potential confounder covariates, based on likelihood-ratio tests compared to the no-confounder model  
203 and inspection of estimates with and without the confounder. For each shortlisted model  $i \in \{1,2,3 \dots K\}$ ,  
204 we then computed a weight (equivalent to a Bayesian posterior probability) between 0 and 1  $w_i = \frac{e^{-\Delta_i/2}}{\sum_{i=1}^K e^{-\Delta_i/2}}$   
205 , where  $\Delta_i = AIC_i - AIC_{\min}$ , i.e. the difference between the model's Akaike Information Criterion (AIC) and  
206 the lowest AIC among all shortlisted models (the AIC is a goodness-of-fit indicator that rewards predictive  
207 accuracy and parsimony, i.e. the fewest possible model terms). Finally, we computed a weighted average  
208 estimate of  $\hat{n}_{000(0)} = \sum_{i=1}^K w_k \hat{n}_{000(0),i}$ . We present results overall and by period.

209

### 210 *Alternative list groupings*

211 Capture-recapture analysis is unfeasible when the overlap among the lists is very poor, causing models  
212 not to fit (see above). To avoid these problems, for our main analysis we grouped lists together that  
213 plausibly reflected similar sources of community information: community leaders' and their spouses' lists

214 were combined in sites A4, T1 and T3; community leaders' and senior citizens' lists were combined in sites  
215 T1, T2, T3 and T4; community leaders' and imams' lists were combined in sites T1, T2 and T3. This yielded  
216 between two and four grouped lists per site (Table 1).

217 As an alternative analysis, we (i) combined imams' and burial preparers' lists across all sites to form one  
218 list and (ii) added records obtained from teachers and senior citizens to the community leaders' lists.

219

## 220 Population estimates and death rates

221 We previously estimated the all-age population of Yemen between 2014 and 2021, by month and sub-  
222 district (administrative level 3), using a combination of pre-crisis census, geospatial projections by  
223 WorldPop (available at 100 m<sup>2</sup> resolution, and resulting from extensively validated predictive statistical  
224 models [26]) and displacement flow data. Details are provided in Checchi et al. [27]. However, only two  
225 sites (T2, T5) consisted of entire subdistricts. In remaining sites, researchers attempted to collect GPS  
226 coordinates of all corners of the site (e.g. road boundaries) using their phones. We overlaid these polygons,  
227 and the boundaries of the surrounding subdistricts, onto WorldPop projections for 2017 (the mid-point of  
228 the data collection period) to compute the approximate proportion of the subdistrict's population that fell  
229 within the site. We then multiplied our subdistrict estimates by this proportion to estimate the site's  
230 population. Site boundaries, and thus populations, were unresolved for two sites (A1, T3). We used  
231 population estimates to compute average death rates by period (pre-pandemic and pandemic). We  
232 specifically present crude death rates among people aged  $\geq 15$ yo (CDR15+), per all-age population: this  
233 may be thought of as an age-specific fraction of the all-age CDR.

234

## 235 Results

### 236 Decedent records

237 Between 14 January and 31 March 2021, 138 interviews were conducted (56 in Aden, 82 in Ta'iz: Figure  
238 1), yielding 3022 decedent records. Across all sites, only 35/138 (25.4%) interviews were conducted with  
239 female informants (midwives, health workers, wives of community leaders and burial preparers).

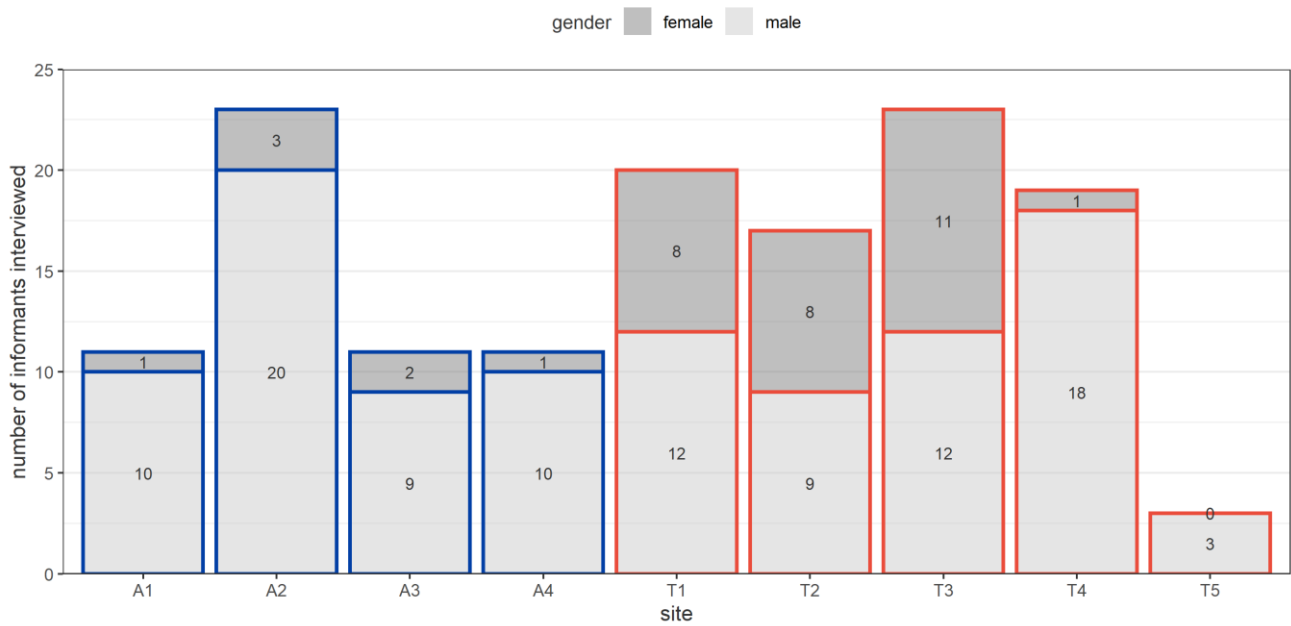

240

241 Figure 1. Number of key informant interviews done, by site and gender of the informant.

242

243 Apart from 2014, when the number of recalled deaths was 138, the annual number of death events recalled  
 244 by informants did not appear to decrease as time became more remote (range = 269 to 372) (Figure 2).  
 245 The largest number of deaths were reported for 2020 (N = 574). The highest number of deaths was  
 246 reported by participants from site T1 (N = 718) and the lowest from T5 (N = 81).

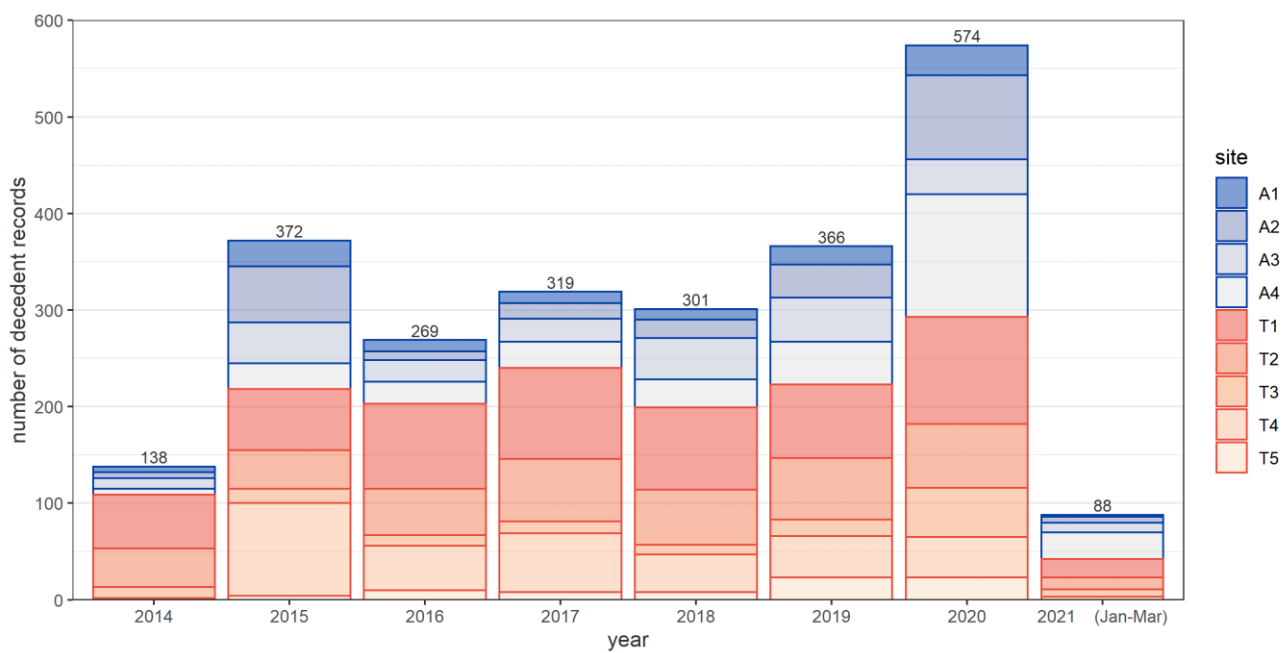

247

248 Figure 2. Number of decedent records reported by key informants, by year and site.

249

## 250 Characteristics of reported deaths

251 After record linkage (including definite, probable and possible matches) and excluding 21 non- analysable  
 252 records due to one or more missing variables, 2445 unique decedents were identified across all sites. All  
 253 sites except for T3 were notable for the sparsity of data on children (only 189/2445 or 7.7% reported  
 254 decedents were aged <15yo), and for a disproportion of males (1851/2445, 75.7%; Table 2). Site T4  
 255 featured an exceptionally large share of deaths in the 15-44yo stratum while in the remaining sites the  
 256 highest numbers of deaths were reported among people aged ≥ 45yo. Site-specific detail by list is provided  
 257 in the Supplementary File.

258

259 **Table 2. Age and gender distribution of reported deaths, by site.**

| site:         | A1            | A2             | A3             | A4             | T1             | T2             | T3            | T4             | T5            |
|---------------|---------------|----------------|----------------|----------------|----------------|----------------|---------------|----------------|---------------|
| <b>Age</b>    |               |                |                |                |                |                |               |                |               |
| Mean          | 48.5y         | 57.3y          | 54.4y          | 58.1y          | 43.6y          | 49.7y          | 38.1y         | 33.4y          | 53.9y         |
| 0y            | 1<br>(0.8%)   | 0<br>(0.0%)    | 2<br>(0.9%)    | 2<br>(0.6%)    | 26<br>(4.3%)   | 9<br>(2.3%)    | 27<br>(20.0%) | 4<br>(1.2%)    | 0<br>(0.0%)   |
| 1y to 4y      | 3<br>(2.5%)   | 2<br>(0.9%)    | 1<br>(0.4%)    | 0<br>(0.0%)    | 6<br>(1%)      | 11<br>(2.8%)   | 7<br>(5.2%)   | 3<br>(0.9%)    | 0<br>(0.0%)   |
| 5y to 14y     | 6<br>(5.0%)   | 3<br>(1.3%)    | 1<br>(0.4%)    | 6<br>(1.9%)    | 29<br>(4.8%)   | 22<br>(5.6%)   | 6<br>(4.4%)   | 10<br>(3.0%)   | 2<br>(2.6%)   |
| 15y to 44y    | 37<br>(30.8%) | 44<br>(18.7%)  | 64<br>(27.4%)  | 65<br>(20.9%)  | 252<br>(41.3%) | 111<br>(28.3%) | 35<br>(25.9%) | 244<br>(73.5%) | 19<br>(25.0%) |
| ≥45y          | 73<br>(60.8%) | 186<br>(79.1%) | 166<br>(70.9%) | 238<br>(76.5%) | 297<br>(48.7%) | 239<br>(61%)   | 60<br>(44.4%) | 71<br>(21.4%)  | 55<br>(72.4%) |
| <b>Gender</b> |               |                |                |                |                |                |               |                |               |
| Female        | 36<br>(30.0%) | 70<br>(29.8%)  | 53<br>(22.6%)  | 86<br>(27.7%)  | 115<br>(18.9%) | 132<br>(33.8%) | 45<br>(33.3%) | 31<br>(9.3%)   | 26<br>(34.2%) |
| Male          | 84<br>(70.0%) | 165<br>(70.5%) | 181<br>(77.7%) | 225<br>(72.8%) | 495<br>(81.1%) | 260<br>(66.3%) | 90<br>(66.7%) | 301<br>(90.7%) | 50<br>(65.8%) |
| Totals        | 120           | 235            | 234            | 311            | 610            | 392            | 135           | 332            | 76            |

260

261 For 2020 and 2021 only, we collected months of death: when aggregating all sites, a notable peak in  
 262 monthly deaths is evident in May-July 2020, possibly corresponding to the first COVID-19 wave (Figure  
 263 3), with a majority of recalled deaths among people aged ≥ 45yo.

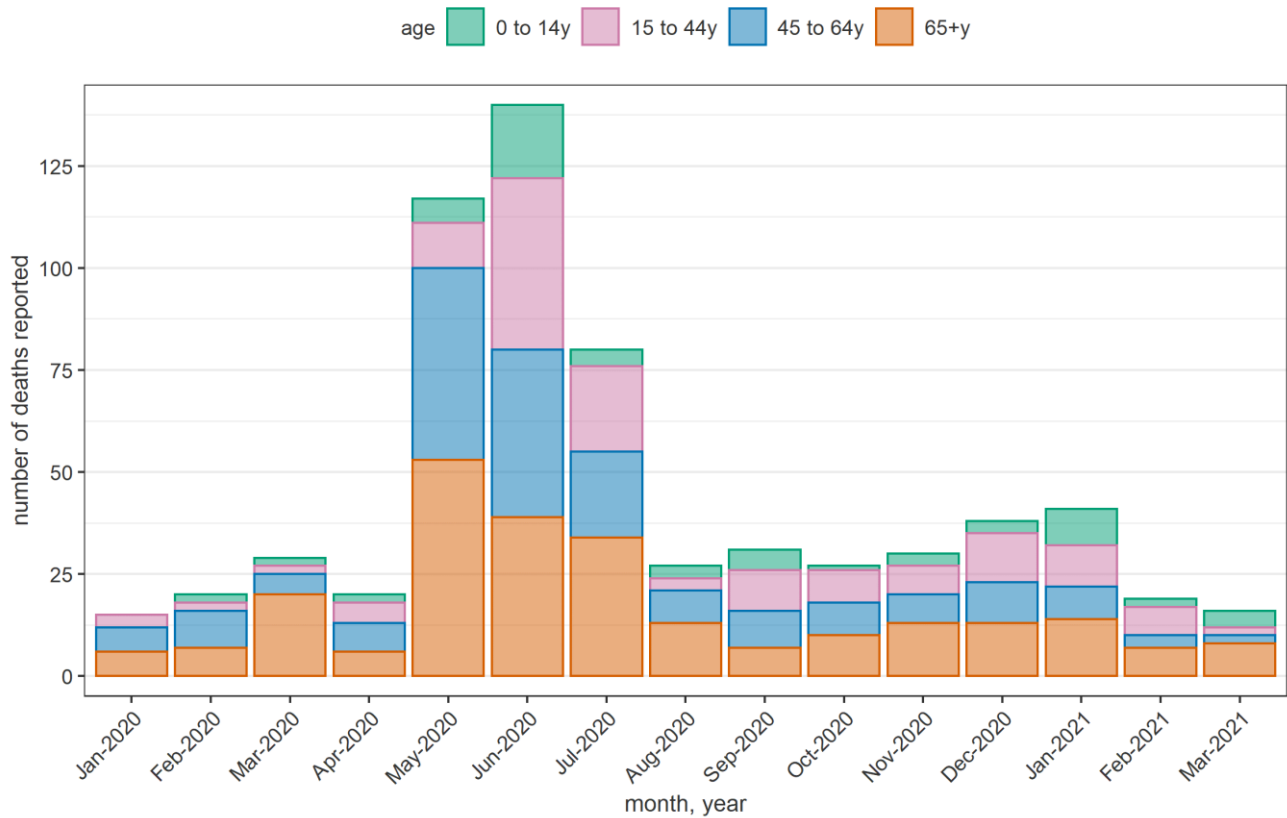

264

265 Figure 3. Number of unique decedents per month reported by informants across all sites, January 2020 to March  
266 2021.

267

268 Across all sites and particularly in A1, T1 and T4, a substantial proportion of deaths was attributed to  
269 intentional or war-related injuries (Table 3).

270

271 Table 3. Causes of death as reported by informants over the entire analysis period, by site.

| Site | Intentional/war injury | Unintentional injury | Other causes | Total |
|------|------------------------|----------------------|--------------|-------|
| A1   | 44 (36.7%)             | 15 (12.5%)           | 61 (50.8%)   | 120   |
| A2   | 38 (16.2%)             | 3 (1.3%)             | 194 (82.6%)  | 235   |
| A3   | 46 (19.7%)             | 15 (6.4%)            | 173 (73.9%)  | 234   |
| A4   | 50 (16.1%)             | 11 (3.5%)            | 250 (80.4%)  | 311   |
| T1   | 244 (40.0%)            | 31 (5.1%)            | 335 (54.9%)  | 610   |
| T2   | 61 (15.6%)             | 23 (5.9%)            | 308 (78.6%)  | 392   |
| T3   | 11 (8.1%)              | 11 (8.1%)            | 113 (83.7%)  | 135   |
| T4   | 168 (50.6%)            | 106 (31.9%)          | 58 (17.5%)   | 332   |
| T5   | 12 (15.8%)             | 0 (0.0%)             | 64 (84.2%)   | 76    |

272

### 273 Estimates of total adult mortality

274 Across all sites, estimates of total deaths overall and by period before and after the first COVID-19 case  
275 was announced in Yemen featured wide 95% confidence intervals (95%CI; Table 4). When considering

276 point estimates, the mean monthly mortality rose appreciably during March 2020 to March 2021 compared  
 277 to January 2014 to February 2020 in sites A1, A2, A4, T3 and T5, remained nearly constant in A3, T1 and  
 278 T2, and declined in T4. The alternative analysis yielded an approximately similar pattern (Table 5).

279

280 **Table 4. Estimates of total deaths and deaths per month, overall and by period (main analysis).**

| Site | estimated total deaths (95%CI) |                          |                       | estimated mean deaths per month |                      |                      |
|------|--------------------------------|--------------------------|-----------------------|---------------------------------|----------------------|----------------------|
|      | Overall                        | Jan 2014 to Feb 2020     | Mar 2020 to Mar 2021  | Overall                         | Jan 2014 to Feb 2020 | Mar 2020 to Mar 2021 |
| A1   | 461<br>(166 to 3570)           | 342<br>(129 to 2049)     | 119<br>(38 to 1520)   | 5.2                             | 4.6                  | 9.9                  |
| A2   | 633<br>(358 to 1636)           | 492<br>(260 to 1340)     | 141<br>(98 to 296)    | 7.1                             | 6.6                  | 11.8                 |
| A3   | 604<br>(373 to 1293)           | 514<br>(319 to 1064)     | 90<br>(55 to 229)     | 6.8                             | 6.9                  | 7.5                  |
| A4   | 1840<br>(664 to 7722)          | 1474<br>(453 to 6720)    | 367<br>(211 to 1002)  | 20.9                            | 19.7                 | 30.6                 |
| T1   | 3127<br>(2203 to 4776)         | 2361<br>(1631 to 3732)   | 455<br>(227 to 1451)  | 35.5                            | 31.5                 | 37.9                 |
| T2   | 839<br>(613 to 1283)           | 732<br>(534 to 1100)     | 108<br>(79 to 183)    | 9.5                             | 9.8                  | 9.0                  |
| T3   | 1739<br>(291 to 56,295)        | 545<br>(113 to 17,876)   | 322<br>(69 to 10,602) | 19.7                            | 7.3                  | 26.8                 |
| T4   | 4920<br>(2102 to 15,933)       | 3716<br>(1601 to 12,023) | 299<br>(69 to 9902)   | 33.1                            | 49.6                 | 24.9                 |
| T5   | 569<br>(200 to 3769)           | 299<br>(114 to 1985)     | 107<br>(32 to 3649)   | 6.5                             | 4.0                  | 8.9                  |

281

282 **Table 5. Estimates of total deaths and deaths per month, overall and by period (alternative analysis).**

| Site | estimated total deaths (95%CI)                        |                          |                      | estimated mean deaths per month |                      |                      |
|------|-------------------------------------------------------|--------------------------|----------------------|---------------------------------|----------------------|----------------------|
|      | Overall                                               | Jan 2014 to Feb 2020     | Mar 2020 to Mar 2021 | Overall                         | Jan 2014 to Feb 2020 | Mar 2020 to Mar 2021 |
| A1   | 207<br>(35 to 1703)                                   | 155<br>(28 to 1158)      | 52<br>(7 to 544)     | 2.3                             | 2.1                  | 4.3                  |
| A2   | 441<br>(368 to 567)                                   | 308<br>(243 to 437)      | 132<br>(106 to 196)  | 5.0                             | 4.1                  | 11.0                 |
| A3   | 534<br>(424 to 733)                                   | 448<br>(346 to 645)      | 79<br>(56 to 169)    | 6.1                             | 6.0                  | 6.6                  |
| A4   | 845<br>(569 to 1587)                                  | 818<br>(322 to 5430)     | 296<br>(211 to 568)  | 9.6                             | 10.9                 | 24.7                 |
| T1   | No results (all models yielded implausible estimates) |                          |                      |                                 |                      |                      |
| T2   | 915<br>(587 to 2060)                                  | 802<br>(509 to 1815)     | 113<br>(78 to 244)   | 10.4                            | 10.7                 | 9.4                  |
| T3   | No results (all models yielded implausible estimates) |                          |                      |                                 |                      |                      |
| T4   | 4126<br>(2074 to 10,274)                              | 4719<br>(2019 to 15,279) | 119<br>(64 to 485)   | 46.8                            | 62.9                 | 9.9                  |
| T5   | No results (only one list)                            |                          |                      |                                 |                      |                      |

283

284 Available CDR15+ estimates varied considerably across sites (Table 6). There was no consistent pattern  
 285 of increase during the pandemic period, though 95%CIs are uninformatively wide. Sites T1 and T4, where

286 the highest CDR15+ was observed, were also those with the highest percentage of intentional/war injury  
 287 deaths (Table 3) and deaths among young adults (Table 2).

288

289 **Table 6. Estimated crude death rates among people aged ≥15yo, overall and by period (main analysis).**

| Site | deaths ≥15yo per 1000 all-age population per year (95%CI) |                         |                         | deaths ≥15yo per 10,000 all-age population per day (95%CI) |                      |                      |
|------|-----------------------------------------------------------|-------------------------|-------------------------|------------------------------------------------------------|----------------------|----------------------|
|      | Overall                                                   | Jan 2014 to Feb 2020    | Mar 2020 to Mar 2021    | Overall                                                    | Jan 2014 to Feb 2020 | Mar 2020 to Mar 2021 |
| A1   | [no population estimates]                                 |                         |                         |                                                            |                      |                      |
| A2   | 9.1<br>(5.2 to 23.5)                                      | 8.5<br>(4.5 to 23.2)    | 11.9<br>(8.3 to 25.0)   | 0.2<br>(0.1 to 0.6)                                        | 0.2<br>(0.1 to 0.6)  | 0.3<br>(0.2 to 0.7)  |
| A3   | 38.3<br>(23.7 to 82)                                      | 39.5<br>(24.5 to 81.7)  | 32.8<br>(20.0 to 83.4)  | 1.0<br>(0.6 to 2.2)                                        | 1.1<br>(0.7 to 2.2)  | 0.9<br>(0.5 to 2.3)  |
| A4   | 28.2<br>(10.2 to 118.3)                                   | 27.3<br>(8.4 to 124.3)  | 32.7<br>(18.8 to 89.4)  | 0.8<br>(0.3 to 3.2)                                        | 0.7<br>(0.2 to 3.4)  | 0.9<br>(0.5 to 2.4)  |
| T1   | 132.9<br>(93.6 to 203)                                    | 138<br>(95.4 to 218.2)  | 70.8<br>(35.3 to 225.9) | 3.6<br>(2.6 to 5.6)                                        | 3.8<br>(2.6 to 6.0)  | 1.9<br>(1.0 to 6.2)  |
| T2   | 7.5<br>(5.5 to 11.5)                                      | 8.6<br>(6.3 to 12.9)    | 4.0<br>(2.9 to 6.8)     | 0.2<br>(0.2 to 0.3)                                        | 0.2<br>(0.2 to 0.4)  | 0.1<br>(0.1 to 0.2)  |
| T3   | [no population estimates]                                 |                         |                         |                                                            |                      |                      |
| T4   | 56.0<br>(23.9 to 181.4)                                   | 59.8<br>(25.7 to 193.3) | 11.7<br>(2.7 to 385.9)  | 1.5<br>(0.7 to 5.0)                                        | 1.6<br>(0.7 to 5.3)  | 0.3<br>(0.1 to 10.6) |
| T5   | 3.8<br>(1.3 to 24.9)                                      | 2.4<br>(0.9 to 15.9)    | 4.0<br>(1.2 to 137.6)   | 0.1<br>(0.0 to 0.7)                                        | 0.1<br>(0.0 to 0.4)  | 0.1<br>(0.0 to 3.8)  |

290

## 291 Discussion

### 292 Main findings

293 Covering a population of over 100,000 and a period of seven years, our analysis suggests that nine  
 294 purposively selected communities in Yemen, featuring varying exposure to the crisis, experienced highly  
 295 variable death rates among people aged ≥15yo over periods before and during the COVID-19 pandemic.

296 Due to sparse reporting of data on children, we restricted analysis to older age groups; accordingly, our  
 297 CDR15+ indicators are not readily comparable with other crisis-affected settings. Based on United Nations  
 298 demographic projections not accounting for crisis conditions, Yemen would have expected about 115,000  
 299 annual deaths ≥15yo during 2016-2020 within a mid-period population of 27,835,000, yielding a 'baseline'  
 300 CDR15+ of 4.1 per 1000 person-years (0.1 per 10,000 person-days) [28]. In six of the seven study sites  
 301 with available population denominators, the 95%CIs of our CDR15+ estimates exceed this baseline during  
 302 all study periods, suggesting a broad pattern of considerably elevated mortality during the crisis period,

303 with alarmingly high levels in two sites (T1, T4) where the age distribution (15-44 yo) and cause of reported  
304 deaths suggests elevated mortality directly due to armed conflict. We did not observe an obvious increase  
305 in mortality (CDR15+) during the COVID-19 transmission period, but the inaccuracy of period estimates  
306 hampers this comparison; it is possible that in some sites, extreme elevations in mortality during the early  
307 phase of the war, followed by a less acute situation, would have counterbalanced any increase due to  
308 COVID-19 .The distribution of monthly reported deaths during 2020 does suggest the study sites  
309 experienced an acute epidemic peak in May-July temporally consistent with the first wave of the pandemic.  
310 A second wave was reported in Yemen shortly after this study's data collection period.

311 Based on a PubMed search with keywords "mortality" and "Yemen", we identified only two other reports of  
312 population mortality in the country since the crisis began in 2014. In Aden, satellite imagery of cemeteries  
313 and civil registration data suggested a very similar peak in mortality as in this study during May-July 2020  
314 [13]. Ogbu et al. analysed 56 surveys done by humanitarian actors during 2015-2019 and classified  
315 Yemen's governorates into high- and low-child mortality groups [29]; these surveys have been criticised  
316 for under-estimation [5].

317 The sites we investigated are unlikely to be representative of Aden and Ta'iz governorates, or indeed all  
318 of Yemen, and furthermore our estimates are subject to considerable imprecision and potential bias,  
319 highlighting challenges of primary data collection in insecure, politically contested settings (see below).  
320 The study does, however, indicate that community informants are able to recall details of local, adult  
321 decedents, even going back several years.

322

### 323 [Data collection challenges](#)

324 Various challenges of this study arose during implementation. Limited electricity and internet coverage,  
325 ongoing SARS-CoV-2 transmission and unpredictable security conditions constrained data collection,  
326 especially in rural, remote sites within Ta'iz governorate, where the female researcher had to be  
327 accompanied by her spouse to secure travel. Moreover, some informants reported concerns that nominal  
328 details of decedents would be shared with warring parties, resulting either in non-participation or in short  
329 interviews. While informants generally recalled chronologically remote deaths, recall of ages and years of  
330 death was difficult, and informants appeared to mainly remember deaths during salient events (e.g.



331 bombardments or battles) or decedents who are considered 'martyrs' in their community. This may explain  
332 the high proportion of war injury deaths among those reported. Capturing deaths among women and, in  
333 particular, children was difficult across sites, probably reflecting the choice of key informants (mostly men  
334 in positions of authority). Female researchers appeared better able to obtain this information from male  
335 and female participants , suggesting future similar studies in Yemen and comparable cultural settings  
336 should systematically deploy mixed-gender teams to collect data in communities and conduct formative  
337 work to ensure a balanced gender distribution among key informants. Lastly, entry and management of  
338 data on the ODK platform proved straightforward, though entering long lists of names onto smart phones  
339 was time-consuming.

340

## 341 Limitations

342 Capture-recapture analysis involves certain statistical assumptions. Firstly, record linkage should be  
343 accurate, resulting in error-free attribution of decedents to one or more lists. Misclassification could have  
344 occurred due to the complexity of names in Yemen and the high frequency of certain names, combined  
345 with other errors in recall of key linkage variables. The long recall period affected recall of the exact full  
346 names of decedents by the key informants. If decedents are incorrectly classified as unique (i.e. less  
347 overlap among lists), overall mortality estimates would be upward-biased (over-estimated), while the  
348 inverse would happen if decedents on different lists are incorrectly matched. If misclassification is a  
349 function of date of death (e.g. more frequent errors for deaths in the remote past), our estimates of period  
350 mortality would tend to be artefactually higher in the pre-pandemic period than during COVID-19: this may  
351 be an explanation for the high pre-pandemic death rates in several sites, though it should be noted that  
352 data completeness was not correlated with date of death (data not shown).

353 A second assumption of capture-recapture methods is that lists do not draw on each other for information:  
354 this assumption is adjusted for in three- and four-list analyses, but may have biased our estimates for T1,  
355 T3, T4 and T5, where two-list analysis was done (in the latter, senior citizen and community leader lists  
356 may plausibly be non-independent).

357 Across all sites, we observed surprisingly little overlap among lists (Supplementary File), in contrast to  
358 previous applications of this method [30]. This may reflect individual informants being aware of deaths only

359 within a sub-section of the site, difficulty in identifying all informants of the same typology within the site  
360 and/or local kinship, access to information, trust networks and ongoing insecurity.

361 Lastly, population denominators used to compute death rates are also subject to inaccuracy, not captured  
362 in the 95% CIs of our estimates. While all estimates were based on a 2004 census, projections rely on  
363 several statistical models and ground displacement information, all of which will typically have higher  
364 relative error at fine geographic resolution.

## 365 Conclusions

366 This study provides some evidence of elevated mortality in parts of Yemen during the crisis period  
367 (particularly in communities with high death tolls due to war injuries), and of a mortality peak consistent  
368 with the first COVID-19 wave in 2020. However, study limitations considerably weaken this inference: as  
369 such, evidence from this study should be evaluated carefully alongside other efforts to document mortality  
370 and public health impacts of the war in Yemen. Future studies could more specifically compare sites  
371 affected directly by the conflict with those that weren't.

372 This application of a key informant method to document mortality illustrates the feasibility and challenges  
373 of conducting such research in Yemen, and possibly comparable crisis-affected, insecure settings. We  
374 believe that key informant interviews combined with capture-recapture analysis could be applied in conflict-  
375 affected settings by taking into consideration the contextual differences and addressing the limitations we  
376 outline above. This method also has the potential to be applied prospectively as a substitute for non-  
377 functional vital events registration.

378

## 379 Declarations

### 380 Ethics approval and consent to participate

381 The study was approved by the Ethics Committee of the London School of Hygiene and Tropical Medicine  
382 (Ref: 22080) and Faculty of Medicine and Health Science, University of Aden, Yemen (REC-76-2020).  
383 Local approvals from the Ministry of Public Health and Health and Population Office in Ta'iz Governorate  
384 were obtained. All research participants provided verbal informed consents before the interviews.

385

## 386 Consent for publication

387 Not applicable.

388

## 389 Availability of data and materials

390 Due to ongoing armed conflict and insecurity in Yemen, we believe that the benefit of publishing data, even  
391 if anonymised, is outweighed by the risk to participants. We may publish data in the future if the situation  
392 allows. All statistical code, and a dummy dataset that can be used to implement capture-recapture  
393 methods, is published at [https://github.com/francescohecchi/mortality\\_capture\\_recapture\\_analysis](https://github.com/francescohecchi/mortality_capture_recapture_analysis)

394

## 395 Competing interests

396 The authors declare that they have no competing interests.

397

## 398 Funding

399 The study was funded by the United Kingdom Foreign Commonwealth and Development Office, grant  
400 reference 300708-139. Funders were not involved in study design, data collection, analysis, or manuscript  
401 preparation.

402

## 403 Authors' contributions

404 Study design: FC, MA. In-country supervision: HB, FO, KZ. External supervision: HB. Data collection: MA,  
405 SA, HK, AB, YS. Data management: MA. Analysis: FC. Drafting manuscript: MA, FC. All authors  
406 commented on the draft and provided substantial inputs. All authors read and approved the final  
407 manuscript.

408

## 409 Acknowledgments

410 We are grateful to all participants who gave their time to support this study, especially those in Yemen,  
411 who work and live under conditions of extreme hardship and adversity.

412 ODK servers & support were provided by the LSHTM Global Health Analytics Group ([odk.lshtm.ac.uk](http://odk.lshtm.ac.uk)).

413

## 414 References

415 1. Yemen profile - Timeline. BBC News. 2019. <https://www.bbc.co.uk/news/world-middle-east-14704951>.  
416 Accessed 8 Feb 2022.

417 2. Montgomery M. A Timeline of the Yemen Crisis, from the 1990s to the Present. Arab Center Washington DC.  
418 2021. <https://arabcenterdc.org/resource/a-timeline-of-the-yemen-crisis-from-the-1990s-to-the-present/>.  
419 Accessed 8 Feb 2022.

420 3. Dureab F, Al-Sakkaf M, Ismail O, Kuunibe N, Krisam J, Müller O, et al. Diphtheria outbreak in Yemen: The  
421 impact of conflict on a fragile health system. *Conflict and Health*. 2019;13:1–7.

422 4. Elnakib S, Elaraby S, Othman F, BaSaleem H, Abdulghani AlShawafi NA, Saleh Al-Gawfi IA, et al. Providing  
423 care under extreme adversity: The impact of the Yemen conflict on the personal and professional lives of health  
424 workers. *Social Science & Medicine*. 2021;272:113751.

425 5. Maxwell D, Hailey P, Spainhour Baker L, Janet Kim J. Constraints and Complexities of Information and  
426 Analysis in Humanitarian Emergencies: Evidence from Yemen. 2019.

427 6. AlKarim T, Abbara A, Attal B. Armed conflict alone does not explain the devastation of Yemen's health system.  
428 *BMJ Glob Health*. 2021;6:e004740.

429 7. The Lancet Global Health. Yemen needs a concrete plan—now. *The Lancet Global Health*. 2019;7:e1.

430 8. Qirbi N, Ismail SA. Health system functionality in a low-income country in the midst of conflict: the case of  
431 Yemen. *Health Policy and Planning*. 2017;32:911–22.

- 432 9. Dureab F, Shibib K, Al-Yousufi R, Jahn A. Yemen: Cholera outbreak and the ongoing armed conflict. The  
433 Journal of Infection in Developing Countries. 2018;12:397–403.
- 434 10. Group of Eminent International and Regional Experts on Yemen. Situation of human rights in Yemen,  
435 including violations and abuses since September 2014. 2019.
- 436 11. United Nations Office for Coordination of Humanitarian Affairs. Yemen Plan to reach 5.1 million people at  
437 risk of famine - Yemen.
- 438 12. Dureab F, Hussain T, Sheikh R, Al-Dheeb N, Al-Awlaqi S, Jahn A. Forms of Health System Fragmentation  
439 During Conflict: The Case of Yemen. *Frontiers in Public Health*. 2021;9:659980.
- 440 13. Besson EK, Norris A, Bin Ghouth AS, Freemantle T, Alhaffar M, Vazquez Y, et al. Excess mortality during  
441 the COVID-19 pandemic in Aden governorate, Yemen: A geospatial and statistical analysis. *BMJ Global Health*.  
442 2020;:2020.10.27.20216366.
- 443 14. Al-Hamdani R, Wilson R. Yemen's Response to Covid-19: Part I. 2020.
- 444 15. Yemen: Houthis Risk Civilians' Health in Covid-19. Human Rights Watch. 2021.
- 445 16. Dureab F, Al-Awlaqi S, Jahn A. COVID-19 in Yemen: preparedness measures in a fragile state. *The Lancet*  
446 *Public Health*. 2020;5:e311.
- 447 17. Checchi F, Warsame A, Treacy-Wong V, Polonsky J, van Ommeren M, Prudhon C. Public health information  
448 in crisis-affected populations: a review of methods and their use for advocacy and action. *The Lancet*.  
449 2017;390:2297–313.
- 450 18. Checchi F, Roberts L. Documenting Mortality in Crises: What Keeps Us from Doing Better? *PLOS Medicine*.  
451 2008;5:e146.
- 452 19. Jawad M, Hone T, Vamos EP, Roderick P, Sullivan R, Millett C. Estimating indirect mortality impacts of  
453 armed conflict in civilian populations: Panel regression analyses of 193 countries, 1990-2017. *BMC Medicine*.  
454 2020;18:1–11.
- 455 20. Ekzayez A, Alhaj Ahmad Y, Alhaleb H, Checchi F. The impact of armed conflict on utilisation of health  
456 services in north-west Syria: an observational study. *Conflict and Health* 2021 15:1. 2021;15:1–10.

- 457 21. Supreme Council for the Management and Coordination of Humanitarian Affairs and International  
458 Cooperation SCMCHA. <https://www.scmcha.org/en/>. Accessed 6 Feb 2022.
- 459 22. Open Data Kit. <https://opendatakit.org/>. Accessed 6 Feb 2022.
- 460 23. Sadinle M. Transformed Logit Confidence Intervals for Small Populations in Single Capture–Recapture  
461 Estimation. <http://dx.doi.org/10.1080/03610910903168595>. 2009;38:1909–24.
- 462 24. Rossi G, Pepe P, Curzio O, Marchi M. Parameterization of Continuous Covariates in the Poisson Capture-  
463 Recapture Log Linear Model for Closed Populations. *Statistica*. 2019;79:427–43.
- 464 25. Rossi G, Pepe P, Curzio O, Marchi M. Generalized linear models and Capture-Recapture Method in a closed  
465 population: strengths and weaknesses. *Statistica*. 2010;70:371–90.
- 466 26. Stevens FR, Gaughan AE, Linard C, Tatem AJ. Disaggregating Census Data for Population Mapping Using  
467 Random Forests with Remotely-Sensed and Ancillary Data. *PLoS ONE*. 2015;10:e0107042.
- 468 27. Checchi F, Koum Besson ES. Reconstructing subdistrict-level population denominators in Yemen after six  
469 years of armed conflict and forced displacement. *Journal of Migration and Health*. 2022;5:100105.
- 470 28. United Nations D of E, Social Affairs PD. World Population Prospects - Population Division - United Nations.  
471 2019.
- 472 29. Ogbu TJ, Rodriguez-Llanes JM, Moitinho de Almeida M, Speybroeck N, Guha-Sapir D. Human insecurity  
473 and child deaths in conflict: evidence for improved response in Yemen. *International Journal of Epidemiology*.  
474 2022;:dyac038.
- 475 30. Roberts B, Morgan OW, Sultani MG, Nyasulu P, Rwebangila S, Myatt M, et al. A new method to estimate  
476 mortality in crisis-affected and resource-poor settings: validation study. *Int J Epidemiol*. 2010;39:1584–96.
